# Supplementary material for: An ultrastable La-MOF for catalytic hydrogen transfer of furfural: in situ activation of the surface
Source: Royal Society of Chemistry journal article supplement (doi:10.1039/d2nr07151g), 2023-01-01
Supplement: d2nr07151g1.pdf [file d2nr07151g1.pdf]

## Supporting Information

### An ultrastable La-MOF for catalytic hydrogen transfer of furfural: in-situ activation of surface

Xu Zhao,<sup>a</sup> Lu Sun,<sup>a</sup> Zhouxiao Zhai,<sup>a</sup> Di Tian,<sup>a</sup> Ying Wang,<sup>a</sup> Xiaoqin Zou,<sup>\*b</sup> Chungang Min,<sup>c</sup> Changfu Zhuang,<sup>\*a</sup>

<sup>a</sup>Key Laboratory of State Forestry and Grassland Administration on Highly-Efficient Utilization of Forestry Biomass Resources in Southwest China, Southwest Forestry University, Kunming 650051, P. R. China.

<sup>b</sup>Faculty of Chemistry, Northeast Normal University, Changchun 130024, P. R. China.

<sup>c</sup>Research Center for Analysis and Measurement, Kunming University of Science and Technology, Kunming 650093, P. R. China.

*\*Corresponding authors*

Dr. Changfu Zhuang

E-mail: cfzhuang@swfu.edu.cn

Prof. Xiaoqin Zou

E-mail: zouxq100@nenu.edu.cn

## Contents

**Computational Method.**

**Fig. S1. Coordination environment diagram of La<sub>1</sub> and La<sub>2</sub> in LaQS**

**Fig. S2. TEM of LaQS lamellar structure**

**Table S1. Different N contents in LaQS and different ways of activating LaQS**

**Table S2. Specific surface area, pore volume, pore size of LaQS and different ways of activating LaQS**

**Table S3. Selected Bond Lengths (Å) and Selected Bond Angles (deg) for the compound of LaQS**

## Computational Method.

All density functional theory calculations were performed using the Vienna ab initio simulation package (VASP).<sup>1, 2</sup> The generalized gradient approximation of Perdew–Burke–Ernzerhof (PBE) was employed to describe the exchange-correlation.<sup>3</sup> The cut-off energy of 400 eV was used for the plane wave, and the ionic positions of all structures were relaxed until the force converged to below  $-0.05 \text{ eV}\cdot\text{\AA}^{-1}$ . A k-point of  $2 \times 2 \times 3$  set was adopted. The vacuum space between slabs along the  $z$ -direction was set at a minimum of 15 Å. Moreover, charges transfer are analyzed based on the Bader theory.<sup>4</sup>

[1] Kresse, G.; Furthmüller, J. *Comput. Mater. Sci.* 1996, 6, 15–50.

[2] Kresse, G.; Furthmüller, J. *Phys. Rev. B: Condens. Matter Mater. Phys.* 1996, 54, 11169–11186.

[3] J.P. Perdew, K. Burke, M. Ernzerhof, Generalized gradient approximation made simple, *Phys. Rev. Lett.* 77 (1996) 3865–3868.

[4] R.F.W. Bader, *Atoms in Molecules: A Quantum Theory*, International Series of Monographs on Chemistry, Clarendon Press, Oxford, 1990.

**Fig. S1 Coordination environment diagram of La<sub>1</sub> and La<sub>2</sub> in LaQS**

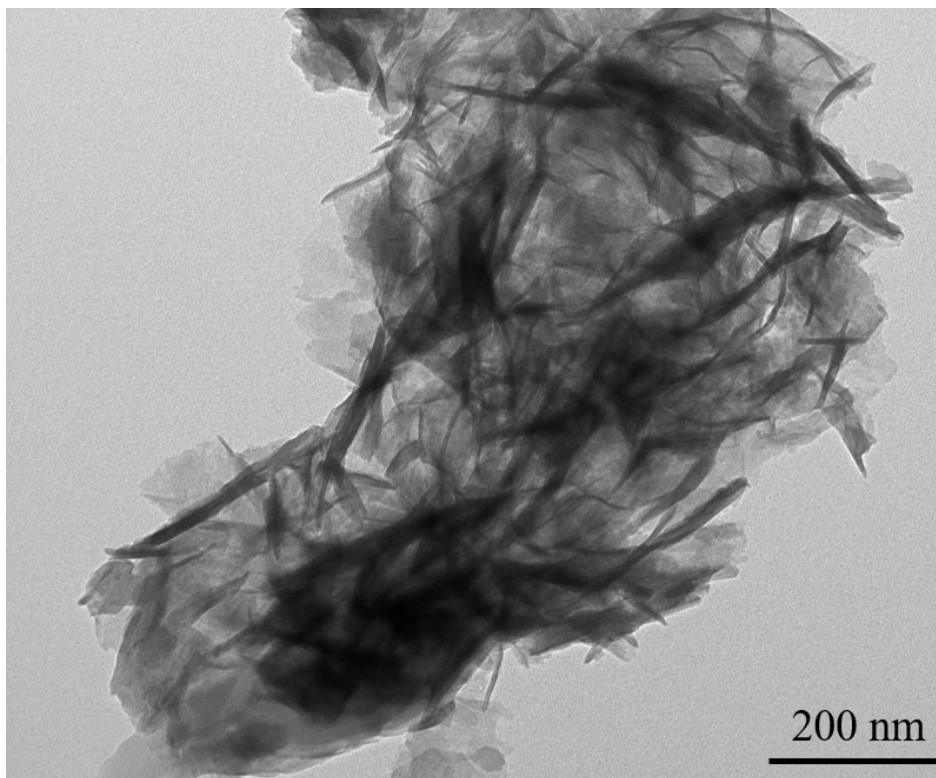

**Fig. S2. TEM of LaQS lamellar structure**

**Table S1. Different N contents in LaQS and LaQS-A**

| Sample              | N <sub>Quinoline</sub> (%) | N <sub>DMF</sub> (%) |
|---------------------|----------------------------|----------------------|
| LaQS                | 31.00                      | 65.48                |
| LaQS-A <sub>1</sub> | 63.3                       | 34.63                |
| LaQS-A <sub>2</sub> | 68.37                      | 28.78                |
| LaQS-A <sub>3</sub> | 74.14                      | 24.46                |

**Table S2. Specific surface area, pore volume, pore size of LaQS and LaQS-A**

| Sample              | S <sub>Langmuir</sub> | Pore Volume (cm <sup>3</sup> g <sup>-1</sup> ) | Pore Size (nm) |
|---------------------|-----------------------|------------------------------------------------|----------------|
| LaQS                | 293.24                | 0.14                                           | 3.61           |
| LaQS-A <sub>1</sub> | 621.74                | 0.31                                           | 3.57           |
| LaQS-A <sub>2</sub> | 827.77                | 0.36                                           | 2.64           |
| LaQS-A <sub>3</sub> | 843.37                | 0.34                                           | 2.50           |

**Table S3. Selected Bond Lengths (Å) and Selected Bond Angles (deg) for the compound of LaQS**

|                     |            |                     |            |
|---------------------|------------|---------------------|------------|
| La(1)-O(3)#1        | 2.547(5)   | La(1)-O(3)#2        | 2.547(5)   |
| La(1)-O(3)          | 2.547(5)   | La(1)-O(1)          | 2.550(5)   |
| La(1)-O(1)#2        | 2.550(5)   | La(1)-O(1)#1        | 2.550(5)   |
| La(1)-O11#2         | 2.598(6)   | La(1)-O(5)#2        | 2.598(6)   |
| La(1)-O(5)#1        | 2.598(6)   | La(1)-O11#1         | 2.598(6)   |
| La(1)-O11           | 2.598(6)   | La(1)-O(5)          | 2.598(6)   |
| La(2)-O(1)          | 2.508(5)   | La(2)-O(1)#2        | 2.508(5)   |
| La(2)-O(1)#1        | 2.508(5)   | La(2)-O(2)#1        | 2.516(5)   |
| La(2)-O(2)#2        | 2.516(5)   | La(2)-O(2)          | 2.516(5)   |
| La(2)-N(1)#1        | 2.801(6)   | La(2)-N(1)          | 2.802(6)   |
| La(2)-N(1)#2        | 2.802(6)   |                     |            |
| O(3)#1-La(1)-O(3)#2 | 74.75(19)  | O(3)#1-La(1)-O(3)   | 74.75(19)  |
| O(3)#2-La(1)-O(3)   | 74.75(19)  | O(3)#1-La(1)-O(1)   | 144.99(15) |
| O(3)#2-La(1)-O(1)   | 96.23(16)  | O(3)-La(1)-O(1)     | 136.42(15) |
| O(3)#1-La(1)-O(1)#2 | 96.23(16)  | O(3)#2-La(1)-O(1)#2 | 136.42(15) |
| O(3)-La(1)-O(1)#2   | 144.99(15) | O(1)-La(1)-O(1)#2   | 66.78(16)  |
| O(3)#1-La(1)-O(1)#1 | 136.42(15) | O(3)#2-La(1)-O(1)#1 | 144.99(15) |
| O(3)-La(1)-O(1)#1   | 96.23(16)  | O(1)-La(1)-O(1)#1   | 66.78(16)  |
| O(1)#2-La(1)-O(1)#1 | 66.79(16)  | O(3)#1-La(1)-O11#2  | 71.13(18)  |
| O(3)#2-La(1)-O11#2  | 67.25(18)  | O(3)-La(1)-O11#2    | 134.01(18) |
| O(1)-La(1)-O11#2    | 74.19(17)  | O(1)#2-La(1)-O11#2  | 69.49(16)  |
| O(1)#1-La(1)-O11#2  | 129.75(16) | O(3)#1-La(1)-O(5)#2 | 71.13(18)  |
| O(3)#2-La(1)-O(5)#2 | 67.25(18)  | O(3)-La(1)-O(5)#2   | 134.01(18) |
| O(1)-La(1)-O(5)#2   | 74.19(17)  | O(1)#2-La(1)-O(5)#2 | 69.49(16)  |
| O(1)#1-La(1)-O(5)#2 | 129.75(16) | O(3)#1-La(1)-O(5)#1 | 67.24(18)  |
| O(3)#2-La(1)-O(5)#1 | 134.01(18) | O(3)-La(1)-O(5)#1   | 71.12(18)  |
| O(1)-La(1)-O(5)#1   | 129.75(16) | O(1)#2-La(1)-O(5)#1 | 74.19(17)  |
| O(1)#1-La(1)-O(5)#1 | 69.49(17)  | O(5)#2-La(1)-O(5)#1 | 119.995(5) |
| O(3)#1-La(1)-O11#1  | 67.24(18)  | O(3)#2-La(1)-O11#1  | 134.01(18) |
| O(3)-La(1)-O11#1    | 71.12(18)  | O(1)-La(1)-O11#1    | 129.75(16) |
| O(1)#2-La(1)-O11#1  | 74.19(17)  | O11#2-La(1)-O11#1   | 119.995(5) |
| O(1)#1-La(1)-O11#1  | 69.49(17)  | O(3)#1-La(1)-O11    | 134.01(18) |
| O(3)#2-La(1)-O11    | 71.12(18)  | O(1)-La(1)-O11      | 69.49(17)  |
| O(3)-La(1)-O11      | 67.24(18)  | O(1)#2-La(1)-O11    | 129.75(16) |
| O(1)#1-La(1)-O11    | 74.19(17)  | O11#1-La(1)-O11     | 119.994(3) |
| O11#2-La(1)-O11     | 119.996(5) | O(3)#1-La(1)-O(5)   | 134.01(18) |
| O(3)#2-La(1)-O(5)   | 71.12(18)  | O(1)-La(1)-O(5)     | 69.49(17)  |

|                     |             |                     |             |
|---------------------|-------------|---------------------|-------------|
| O(3)-La(1)-O(5)     | 67.24(18)   | O(1)#2-La(1)-O(5)   | 129.75(16)  |
| O(1)#1-La(1)-O(5)   | 74.19(17)   | O(5)#1-La(1)-O(5)   | 119.994(3)  |
| O(5)#2-La(1)-O(5)   | 119.996(5)  | O(1)-La(2)-O(1)#2   | 68.04(17)   |
| O(1)-La(2)-O(1)#1   | 68.04(17)   | O(1)-La(2)-O(2)#1   | 131.16(15)  |
| O(1)#2-La(2)-O(1)#1 | 68.04(17)   | O(1)#2-La(2)-O(2)#1 | 93.39(16)   |
| O(1)#1-La(2)-O(2)#1 | 147.42(15)  | O(1)#2-La(2)-O(2)#2 | 147.42(15)  |
| O(1)-La(2)-O(2)#2   | 93.39(16)   | O(1)#1-La(2)-O(2)#2 | 131.16(15)  |
| O(2)#1-La(2)-O(2)#2 | 78.69(19)   | O(1)#2-La(2)-O(2)   | 131.16(15)  |
| O(1)-La(2)-O(2)     | 147.42(15)  | O(1)#1-La(2)-O(2)   | 93.39(16)   |
| O(2)#1-La(2)-O(2)   | 78.69(19)   | O(1)-La(2)-N(1)#1   | 79.05(16)   |
| O(2)#2-La(2)-O(2)   | 78.69(19)   | O(1)#2-La(2)-N(1)#1 | 126.22(16)  |
| O(1)#1-La(2)-N(1)#1 | 60.49(15)   | O(2)#2-La(2)-N(1)#1 | 72.04(17)   |
| O(2)#1-La(2)-N(1)#1 | 139.29(17)  | O(2)-La(2)-N(1)#1   | 68.42(17)   |
| O(1)-La(2)-N(1)     | 60.49(15)   | O(1)#1-La(2)-N(1)   | 126.22(16)  |
| O(1)#2-La(2)-N(1)   | 79.05(16)   | O(2)#1-La(2)-N(1)   | 72.04(17)   |
| O(2)#2-La(2)-N(1)   | 68.42(17)   | N(1)#1-La(2)-N(1)   | 119.840(17) |
| O(2)-La(2)-N(1)     | 139.29(17)  | O(1)#1-La(2)-N(1)#2 | 79.05(16)   |
| O(1)-La(2)-N(1)#2   | 126.21(16)  | O(2)#1-La(2)-N(1)#2 | 68.42(17)   |
| O(1)#2-La(2)-N(1)#2 | 60.48(15)   | O(2)#2-La(2)-N(1)#2 | 139.29(17)  |
| O(2)-La(2)-N(1)#2   | 72.04(17)   | N(1)-La(2)-N(1)#2   | 119.840(17) |
| N(1)#1-La(2)-N(1)#2 | 119.843(17) |                     |             |

---

Symmetry transformations used to generate equivalent atoms:

|                  |                  |                 |
|------------------|------------------|-----------------|
| #1 -x+y+1,-x+1,z | #2 -y+1, x-y, z  | #3 x, y, z+1    |
| #4 x, y, z-1     | #5 y, -x+y, -z+1 | #6 x-y, x, -z+1 |
